# Supplementary material for: Adjusting Disease Risk Index for Regional Variations and Donor Selection: TRUMP cohort study
Source: Research Square preprint supplement (doi:10.21203/rs.3.rs-7394766/v1), 2025-09-03
Supplement: Supplementary file 1 [file 590bda0f4bce74ce71779275.docx]

| **Supplementary Table1. Multivariate analysis of overall survival for rDRI and raDRI in the validation cohort** | | | | |
| --- | --- | --- | --- | --- |
| **Index** | **rDRI** | | **raDRI** | |
|  | **HR (95%CI)** | **P** | **HR (95%CI)** | **P** |
| **Low** | 1.00 (ref) |  | 1.00 (ref) |  |
| **Intermediate** | 1.58(1.16-2.16) | .004 | 1.57(1.27-1.94) | <.001 |
| **High** | 3.16(2.31-4.31) | <.001 | 3.35(2.75-4.08) | <.001 |
| **Very high** | 5.75(4.15-7.95) | <.001 | 5.64(4.57-6.95) | <.001 |
| **Abbreviations:** HR, hazard ratio; CI, confidence interval; rDRI, refined disease risk index; raDRI, region-adjusted disease risk index | | | | |
|  |
|  |
